# Supplementary material
Source: PubMed Central journal article supplement (PMC2853996)

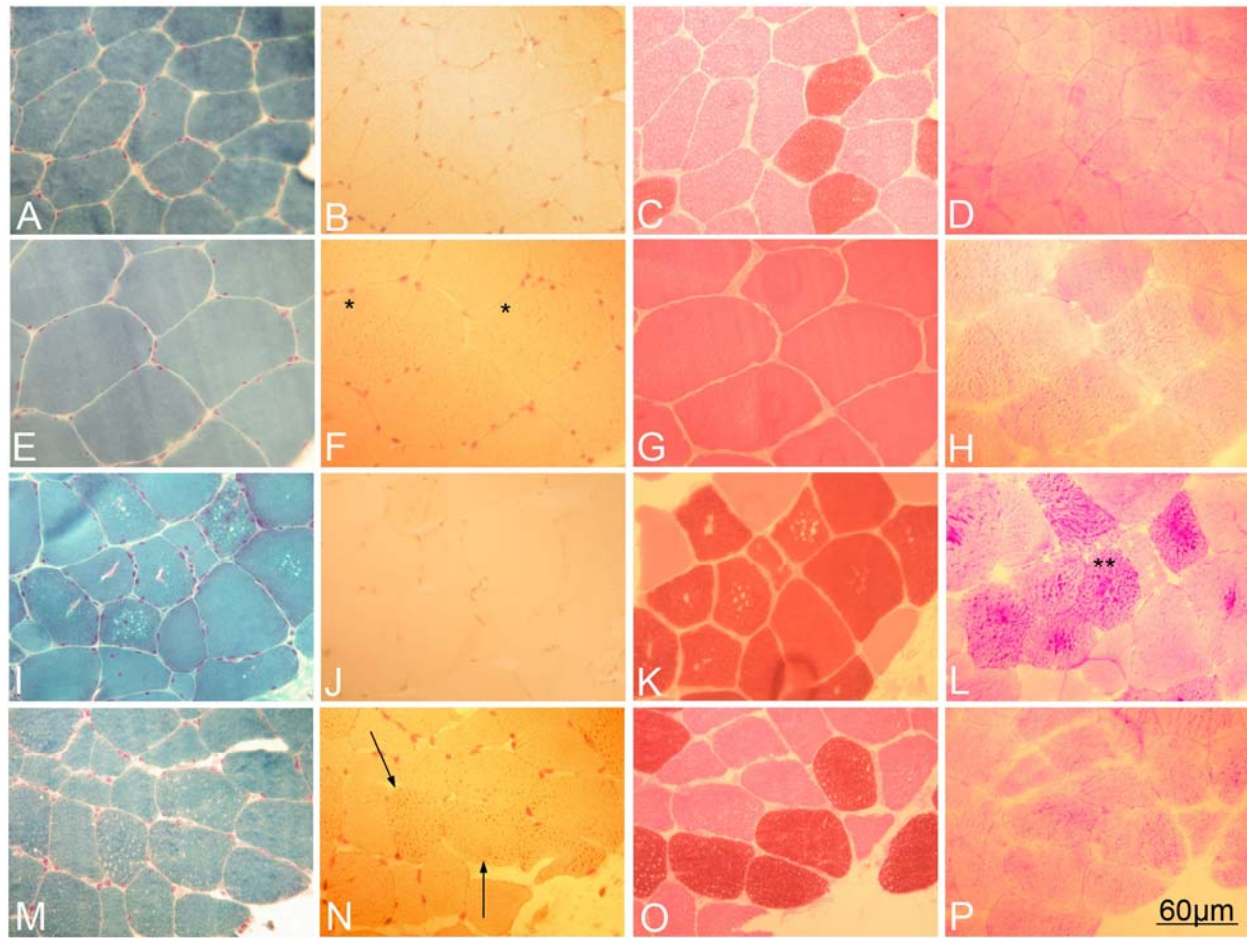

Suppl. Fig. 1

Supplement: supp_jc.2009-1293_MS_09_1293_Suppl_Fig_1.pdf [file supp_jc.2009-1293_MS_09_1293_Suppl_Fig_1.pdf]
